# Supplementary material
Source: PubMed Central journal article supplement (PMC2635831)
Supplement: 0806804106_0806804106SI.pdf [file 0806804106_0806804106SI.pdf]

# Supporting Information

Galarza *et al.* 10.1073/pnas.0806804106

## SI Text

**Microsatellite Data Analysis.** DNA extractions were performed from pectoral fin tissue following either HotSHOT protocol (1), or the Chelex 10% protocol (2). A total of 63 microsatellite loci (mean 9 loci per species) were successfully amplified by PCR (3–8). Amplified products were resolved on an ABI3100 or an ABI 3700 Genetic Analyser (Applied Biosystems). Allele scoring was carried out by using GeneMapper v 3.5 software (Applied Biosystems). The total number of alleles per locus and sample was obtained by using GENETIX v.4.02 (9). Observed and expected heterozygosities were determined by using the software package Arlequin v. 2.0 (10). Deviations from Hardy–Weinberg expectations were estimated according to the level of significance determined by a Markov chain method by using GENEPOP v. 3.4 (11). Bonferroni corrections were made for multiple tests.

The number of analyzed individuals and mean number of alleles for each species in each locality is given in Table S1. The majority of the assayed microsatellite loci showed high levels of polymorphism. The total number of alleles per locus, observed and expected heterozygosity as well as Hardy–Weinberg expectations, are listed in Table S2. No evidence of linkage disequilibrium was found between locus pairs. Significant deviations from Hardy–Weinberg expectations within sampling locations were observed for most species. Out of 252 tests across species, 30 remained significant after Bonferroni correction. One or two loci accounted for >90% of the deviations from Hardy–Weinberg expectations for a particular species (Table S2). These loci, *Dvul2*, *Dvul63*, *Msur14*, *Sc05*, *Td09*, *St138*, *Aimb17*, and *Aimb22*, were removed from further analysis. Exclusion of these loci made little difference to the overall estimates of population structure; although the magnitude of the  $F_{ST}$  values changed slightly, the statistical significance remained unaltered.

1. Truett GE, *et al.* (2000) Preparation of PCR-quality mouse genomic DNA with hot sodium hydroxide and Tris (HotSHOT). *BioTechniques* 29:52–54.
2. Estoup A, Largiadèr CR, Perrot E, Chourrou D (1996) Rapid one tube DNA extraction for reliable PCR detection of fish polymorphic markers and transgenes. *Mol Mar Biol Biotech* 5:295–298.
3. Carreras-Carbonell J, Macpherson E, Pascual M (2004) Isolation and characterization of microsatellite loci in *Tripterygion delaisi*. *Mol Ecol Notes* 4:438–439.
4. Carreras-Carbonell J, Macpherson E, Pascual M (2006) Characterization of 12 microsatellite markers in *Serranus cabrilla* (Pisces: Serranidae). *Mol Ecol Notes* 6:204–206.
5. Galarza JA, Carreras-Carbonell J, Macpherson E, Turner GF, Rico C (2006) Isolation and characterization of polymorphic microsatellite markers for peacock wrasse (*Symphodus tinca*). *Mol Ecol Notes* 6:747–749.
6. Galarza JA, *et al.* (2007) Polymorphic microsatellite loci for the cardinal fish (*Apogon imberbis*). *Conserv Genet* 8:1251–1253.
7. Roques S, *et al.* (2007) Isolation of eight microsatellites loci from the saddled bream, *Oblada melanura* and cross-species amplification in two sea bream species of the genus *Diplodus*. *Conserv Genet* 8:1255–1257.
8. Roques S, Galarza JA, Macpherson E, Turner GF, Rico C (2007) Isolation and characterization of nine polymorphic microsatellite markers in the two-banded sea bream (*Diplodus vulgaris*) and cross-species amplification in the white sea bream (*Diplodus sargus*) and the saddled bream (*Oblada melanura*). *Mol Ecol Notes* 7:661–663.
9. Belkhir K, Borsa P, Goudet J, Chikhi L, Bonhomme F (1997) *Genetix v. 4.01 Software under Windows for Population Genetics* (Translated from French). Laboratoire Génome, Populations, Interactions (Centre National de la Recherche Scientifique Unité Propre de Recherche 9060, Montpellier, France).
10. Schneider S, Roessli D, Excoffier L (2000) *Arlequin Ver. 2.0: A software for population genetics data analysis*, Genetics and Biometry Laboratory (University of Geneva, Switzerland).
11. Raymond M, Rousset F (1995) GENEPOP (Version 3.4) population genetics software for exact tests and ecumenicism. *J Hered* 86:248–249.

**Table S1. Number of analyzed individuals (*N*) and mean number of alleles (*Na*) for each species in each locality**

| Species                     | Herradura |           | Cabo de Gata |           | Mallorca |           | Blanes   |           |
|-----------------------------|-----------|-----------|--------------|-----------|----------|-----------|----------|-----------|
|                             | <i>N</i>  | <i>Na</i> | <i>N</i>     | <i>Na</i> | <i>N</i> | <i>Na</i> | <i>N</i> | <i>Na</i> |
| <i>Diplodus vulgaris</i>    | 48        | 13.8      | 47           | 14        | 47       | 15.6      | 48       | 15.5      |
| <i>Mullus surmuletus</i>    | 48        | 9.3       | 48           | 11.4      | 48       | 11.9      | 48       | 11.2      |
| <i>Serranus cabrilla</i>    | 32        | 9         | 30           | 10.4      | 30       | 10.4      | 30       | 8.6       |
| <i>Oblada melanura</i>      | 43        | 11.2      | 43           | 11.6      | 47       | 12.2      | 34       | 12        |
| <i>Tripterygion delaisi</i> | 35        | 18.4      | 33           | 16.6      | 42       | 16        | 47       | 18.7      |
| <i>Apogon imberbis</i>      | 32        | 11.2      | 48           | 11.5      | 48       | 10.6      | 47       | 12.5      |
| <i>Symphodus tinca</i>      | 40        | 12        | 57           | 13.6      | 47       | 12.3      | 51       | 14.1      |

Table S2. Summary statistics for microsatellite loci among sampling collections of *D. vulgaris* species

| Species                 | Locus  |               |        |        |        |               |        |        | Overall |
|-------------------------|--------|---------------|--------|--------|--------|---------------|--------|--------|---------|
|                         | Dvul1  | Dvul2         | Dvul33 | Dvul4  | Dvul61 | Dvul63        | Dvul84 | Dvul38 |         |
| <i>D. vulgaris</i> , HE |        |               |        |        |        |               |        |        |         |
| N                       | 48     | 48            | 47     | 48     | 43     | 44            | 46     | 47     |         |
| A                       | 5      | 11            | 17     | 16     | 8      | 16            | 17     | 21     | 13.875  |
| Rs                      | 4.998  | 10.884        | 16.639 | 15.667 | 8      | 15.886        | 16.591 | 20.808 | 13.684  |
| H <sub>O</sub>          | 0.597  | 0.542         | 0.872  | 0.749  | 0.86   | 0.591         | 0.894  | 0.915  |         |
| H <sub>E</sub>          | 0.635  | 0.824         | 0.9    | 0.824  | 0.796  | 0.827         | 0.918  | 0.932  |         |
| F <sub>IS</sub>         | 0.092  | <b>0.341*</b> | 0.032  | 0.123* | 0.139  | <b>0.285*</b> | 0.024  | 0.016  | 0.131   |
| <i>D. vulgaris</i> , CG |        |               |        |        |        |               |        |        |         |
| n                       | 47     | 46            | 48     | 47     | 46     | 44            | 44     | 44     |         |
| a                       | 2      | 10            | 15     | 16     | 26     | 15            | 15     | 13     | 14      |
| Rs                      | 2      | 9.927         | 14.769 | 15.731 | 25.652 | 15            | 14.909 | 12.789 | 13.847  |
| H <sub>O</sub>          | 0.298  | 0.5           | 0.875  | 0.875  | 0.913  | 0.758         | 0.752  | 0.897  |         |
| H <sub>E</sub>          | 0.303  | 0.803         | 0.892  | 0.898  | 0.952  | 0.933         | 0.824  | 0.923  |         |
| F <sub>IS</sub>         | -0.044 | <b>0.372*</b> | 0.015  | 0.027  | 0.042  | <b>0.193*</b> | 0.113* | 0.013  | 0.091   |
| <i>D. vulgaris</i> , MA |        |               |        |        |        |               |        |        |         |
| N                       | 47     | 46            | 47     | 45     | 46     | 47            | 47     | 45     |         |
| A                       | 4      | 12            | 16     | 14     | 26     | 17            | 19     | 17     | 15.625  |
| Rs                      | 3.993  | 11.92         | 15.488 | 13.908 | 25.576 | 16.81         | 18.299 | 18.197 | 15.523  |
| H <sub>O</sub>          | 0.277  | 0.435         | 0.861  | 0.911  | 0.896  | 0.809         | 0.809  | 0.927  |         |
| H <sub>E</sub>          | 0.269  | 0.805         | 0.913  | 0.906  | 0.947  | 0.927         | 0.815  | 0.935  |         |
| F <sub>IS</sub>         | -0.101 | <b>0.462*</b> | 0.101  | -0.009 | 0.086  | 0.128*        | 0.008  | 0.034  | 0.088   |
| <i>D. vulgaris</i> , BL |        |               |        |        |        |               |        |        |         |
| N                       | 48     | 43            | 47     | 48     | 48     | 44            | 48     | 48     |         |
| A                       | 4      | 10            | 13     | 15     | 28     | 14            | 22     | 18     | 15.5    |
| Rs                      | 3.895  | 10            | 12.889 | 14.674 | 27.105 | 13.932        | 20.814 | 17.734 | 15.13   |
| H <sub>O</sub>          | 0.229  | 0.488         | 0.957  | 0.917  | 0.913  | 0.591         | 0.771  | 0.871  |         |
| H <sub>E</sub>          | 0.246  | 0.841         | 0.875  | 0.882  | 0.957  | 0.919         | 0.756  | 0.917  |         |
| F <sub>IS</sub>         | 0.066  | <b>0.413*</b> | -0.095 | -0.041 | 0.081  | <b>0.355*</b> | -0.019 | 0.121  | 0.110   |

n, number of individuals analyzed; a, number of alleles; Rs, allelic richness; H<sub>O</sub>, observed heterozygosity; H<sub>E</sub>, expected heterozygosity; F<sub>IS</sub>, inbreeding coefficient. Asterisk represents significant F<sub>IS</sub> at  $\alpha = 0.05$ . Significant values after Bonferroni corrections are shown in bold italics.

Table S3. Summary statistics for microsatellite loci among sampling collections of *M. surmuletus* species

| Species                   | Locus  |       |               |        |       |        |        |       |        |        | Overall |
|---------------------------|--------|-------|---------------|--------|-------|--------|--------|-------|--------|--------|---------|
|                           | Mb3    | Mb11  | Mb14          | Mb28   | Mb46  | Mb55   | Mb63   | Mb130 | Mb132  | Mb133  |         |
| <i>M. surmuletus</i> , HE |        |       |               |        |       |        |        |       |        |        |         |
| n                         | 48     | 45    | 47            | 48     | 48    | 48     | 46     | 48    | 45     | 48     | 47.1    |
| a                         | 6      | 11    | 16            | 2      | 6     | 7      | 14     | 10    | 10     | 11     | 9.7     |
| R <sub>s</sub>            | 5.677  | 4.862 | 5.729         | 2      | 3.284 | 6.323  | 13.381 | 4.707 | 9.745  | 10.416 | 4.230   |
| H <sub>O</sub>            | 0.444  | 0.868 | 0.743         | 0.182  | 0.765 | 0.653  | 0.815  | 0.760 | 0.846  | 0.793  |         |
| H <sub>E</sub>            | 0.419  | 0.880 | 0.877         | 0.189  | 0.873 | 0.704  | 0.893  | 0.785 | 0.833  | 0.848  |         |
| F <sub>IS</sub>           | -0.060 | 0.178 | <b>0.243*</b> | 0.113  | 0.033 | 0.121  | 0.088  | 0.043 | -0.015 | 0.122* | 0.086   |
| <i>M. surmuletus</i> , CG |        |       |               |        |       |        |        |       |        |        |         |
| n                         | 46     | 45    | 48            | 48     | 44    | 48     | 48     | 48    | 48     | 48     |         |
| a                         | 7      | 18    | 17            | 2      | 5     | 7      | 16     | 15    | 10     | 17     | 11.4    |
| R <sub>s</sub>            | 2.963  | 6.029 | 5.923         | 1.251  | 2.424 | 3.434  | 5.481  | 5.219 | 4.712  | 5.749  | 4.318   |
| H <sub>O</sub>            | 0.520  | 0.862 | 0.651         | 0.068  | 0.528 | 0.658  | 0.850  | 0.814 | 0.790  | 0.829  |         |
| H <sub>E</sub>            | 0.560  | 0.901 | 0.892         | 0.065  | 0.524 | 0.703  | 0.868  | 0.834 | 0.816  | 0.881  |         |
| F <sub>IS</sub>           | 0.082  | 0.106 | <b>0.246*</b> | -0.024 | 0.097 | 0.119* | 0.047  | 0.095 | 0.066  | 0.103  | 0.093   |
| <i>M. surmuletus</i> , MA |        |       |               |        |       |        |        |       |        |        |         |
| n                         | 48     | 48    | 48            | 48     | 42    | 48     | 48     | 48    | 48     | 41     |         |
| a                         | 8      | 11    | 17            | 3      | 5     | 10     | 18     | 14    | 12     | 21     | 11.9    |
| R <sub>s</sub>            | 2.733  | 4.517 | 6.114         | 1.756  | 2.373 | 3.731  | 6.423  | 4.727 | 5.416  | 6.502  | 4.429   |
| H <sub>O</sub>            | 0.326  | 0.720 | 0.722         | 0.178  | 0.492 | 0.660  | 0.930  | 0.768 | 0.857  | 0.896  |         |
| H <sub>E</sub>            | 0.458  | 0.744 | 0.908         | 0.259  | 0.501 | 0.706  | 0.924  | 0.783 | 0.868  | 0.925  |         |
| F <sub>IS</sub>           | 0.199* | 0.097 | <b>0.495*</b> | 0.119* | 0.058 | 0.103  | 0.005  | 0.097 | 0.014  | 0.063  | 0.125   |
| <i>M. surmuletus</i> , BL |        |       |               |        |       |        |        |       |        |        |         |
| n                         | 48     | 48    | 48            | 48     | 44    | 48     | 48     | 48    | 47     | 48     |         |
| a                         | 8      | 21    | 17            | 3      | 4     | 9      | 17     | 13    | 9      | 11     | 11.2    |
| R <sub>s</sub>            | 2.711  | 6.371 | 6.087         | 1.57   | 2.611 | 3.903  | 5.583  | 4.928 | 4.179  | 5.338  | 4.328   |
| H <sub>O</sub>            | 0.467  | 0.863 | 0.891         | 0.174  | 0.565 | 0.761  | 0.851  | 0.778 | 0.826  | 0.849  |         |
| H <sub>E</sub>            | 0.493  | 0.919 | 0.905         | 0.160  | 0.579 | 0.748  | 0.868  | 0.799 | 0.740  | 0.861  |         |
| F <sub>IS</sub>           | 0.065  | 0.086 | <b>0.226*</b> | -0.073 | 0.091 | -0.006 | 0.092  | 0.048 | -0.105 | 0.071  | 0.049   |

n, number of individuals analyzed; a, number of alleles; R<sub>s</sub>, allelic richness; H<sub>O</sub>, observed heterozygosity; H<sub>E</sub>, expected heterozygosity; F<sub>IS</sub>, inbreeding coefficient. Asterisk represents significant F<sub>IS</sub> at  $\alpha = 0.05$ . Significant values after Bonferroni corrections are shown in bold italics.

Table S4. Summary statistics for microsatellite loci among sampling collections of *S. cabrilla* species

| Species                 | Locus  |        |               |        |        |        |        |        |        |        |       | Overall |
|-------------------------|--------|--------|---------------|--------|--------|--------|--------|--------|--------|--------|-------|---------|
|                         | Sc03   | Sc04   | Sc05          | Sc06   | Sc07   | Sc08   | Sc11   | Sc12   | Sc13   | Sc14   | Sc15  |         |
| <i>S. cabrilla</i> , HE |        |        |               |        |        |        |        |        |        |        |       |         |
| n                       | 32     | 32     | 32            | 31     | 32     | 32     | 32     | 30     | 30     | 28     | 31    |         |
| a                       | 8      | 7      | 17            | 10     | 6      | 7      | 4      | 4      | 12     | 16     | 8     | 9       |
| R <sub>s</sub>          | 7.5    | 6.861  | 16.579        | 9.613  | 5.986  | 6.875  | 3.986  | 4      | 11.73  | 16     | 7.797 | 8.811   |
| H <sub>O</sub>          | 0.688  | 0.750  | 0.656         | 0.871  | 0.779  | 0.688  | 0.719  | 0.6    | 0.9    | 0.821  | 0.613 |         |
| H <sub>E</sub>          | 0.662  | 0.804  | 0.939         | 0.818  | 0.801  | 0.741  | 0.671  | 0.591  | 0.868  | 0.916  | 0.641 |         |
| F <sub>IS</sub>         | -0.039 | 0.068  | <b>0.274*</b> | -0.07  | 0.096  | 0.070  | -0.086 | -0.049 | -0.037 | 0.1    | 0.045 | 0.033   |
| <i>S. cabrilla</i> , CG |        |        |               |        |        |        |        |        |        |        |       |         |
| n                       | 30     | 30     | 30            | 29     | 30     | 30     | 30     | 29     | 29     | 29     | 29    |         |
| a                       | 8      | 11     | 20            | 12     | 9      | 11     | 6      | 4      | 12     | 16     | 6     | 10.454  |
| R <sub>s</sub>          | 7.733  | 10.6   | 19.46         | 11.929 | 8.733  | 10.663 | 5.927  | 3.965  | 11.929 | 15.826 | 5.931 | 10.245  |
| H <sub>O</sub>          | 0.767  | 0.867  | 0.733         | 0.864  | 0.8    | 0.767  | 0.694  | 0.345  | 0.897  | 0.893  | 0.652 |         |
| H <sub>E</sub>          | 0.7    | 0.832  | 0.946         | 0.883  | 0.814  | 0.797  | 0.728  | 0.559  | 0.872  | 0.908  | 0.691 |         |
| F <sub>IS</sub>         | -0.124 | -0.041 | <b>0.253*</b> | 0.069  | 0.018  | 0.062  | 0.063  | 0.163* | -0.03  | 0.029  | 0.09  | 0.050   |
| <i>S. cabrilla</i> , MA |        |        |               |        |        |        |        |        |        |        |       |         |
| n                       | 30     | 30     | 30            | 30     | 30     | 30     | 30     | 30     | 30     | 30     | 30    |         |
| a                       | 7      | 9      | 21            | 14     | 9      | 9      | 5      | 6      | 11     | 19     | 5     | 10.454  |
| R <sub>s</sub>          | 6.86   | 8.863  | 20.526        | 13.796 | 8.8    | 8.796  | 4.867  | 5.863  | 10.733 | 18.196 | 4.93  | 10.202  |
| H <sub>O</sub>          | 0.7    | 0.833  | 0.767         | 0.933  | 0.8    | 0.7    | 0.333  | 0.6    | 0.867  | 0.867  | 0.433 |         |
| H <sub>E</sub>          | 0.688  | 0.846  | 0.954         | 0.888  | 0.816  | 0.728  | 0.38   | 0.574  | 0.816  | 0.892  | 0.484 |         |
| F <sub>IS</sub>         | -0.018 | 0.008  | <b>0.198*</b> | -0.051 | 0.01   | 0.039  | 0.051  | -0.085 | -0.062 | 0.03   | 0.06  | 0.016   |
| <i>S. cabrilla</i> , BL |        |        |               |        |        |        |        |        |        |        |       |         |
| n                       | 30     | 30     | 30            | 30     | 30     | 29     | 30     | 30     | 30     | 30     | 30    |         |
| a                       | 7      | 8      | 20            | 12     | 7      | 8      | 3      | 5      | 9      | 12     | 4     | 8.636   |
| R <sub>s</sub>          | 6.8    | 7.863  | 19.719        | 11.73  | 6.867  | 7.861  | 2.997  | 4.93   | 8.863  | 11.723 | 3.933 | 8.48    |
| H <sub>O</sub>          | 0.553  | 0.739  | 0.833         | 0.773  | 0.767  | 0.592  | 0.2    | 0.55   | 0.767  | 0.783  | 0.383 |         |
| H <sub>E</sub>          | 0.579  | 0.771  | 0.952         | 0.829  | 0.763  | 0.64   | 0.215  | 0.621  | 0.799  | 0.822  | 0.401 |         |
| F <sub>IS</sub>         | 0.038  | 0.094  | <b>0.251*</b> | 0.112  | -0.004 | 0.117  | 0.072  | 0.148* | 0.033  | 0.087  | 0.051 | 0.09    |

n, number of individuals analyzed; a, number of alleles; R<sub>s</sub>, allelic richness; H<sub>O</sub>, observed heterozygosity; H<sub>E</sub>, expected heterozygosity; F<sub>IS</sub>, inbreeding coefficient. Asterisk represents significant F<sub>IS</sub> at  $\alpha = 0.05$ . Significant values after Bonferroni corrections are shown in bold italics.

Table S5. Summary statistics for microsatellite loci among sampling collections of *O. melanura* species

| Species                 | Locus         |       |        |               |               |               |        |        | Overall |
|-------------------------|---------------|-------|--------|---------------|---------------|---------------|--------|--------|---------|
|                         | Ome12         | Ome13 | Ome120 | Ome127        | Ome138        | Ome154        | Ome158 | Ome161 |         |
| <i>O. melanura</i> , HE |               |       |        |               |               |               |        |        |         |
| n                       | 43            | 40    | 41     | 43            | 40            | 43            | 43     | 41     |         |
| a                       | 15            | 10    | 3      | 13            | 10            | 16            | 8      | 15     | 11.25   |
| Rs                      | 12.94         | 9.215 | 2.785  | 12.254        | 8.751         | 14.407        | 6.882  | 13.676 | 10.113  |
| H <sub>O</sub>          | 0.868         | 0.872 | 0.186  | 0.877         | 0.83          | 0.851         | 0.744  | 0.884  |         |
| H <sub>E</sub>          | 0.925         | 0.885 | 0.23   | 0.925         | 0.86          | 0.906         | 0.785  | 0.904  |         |
| F <sub>IS</sub>         | <b>0.121*</b> | 0.086 | 0.088  | 0.051         | 0.106         | <b>0.115*</b> | 0.035  | 0.145  | 0.093   |
| <i>O. melanura</i> , CG |               |       |        |               |               |               |        |        |         |
| n                       | 43            | 43    | 41     | 41            | 43            | 41            | 43     | 42     |         |
| a                       | 17            | 8     | 3      | 15            | 10            | 16            | 9      | 15     | 11.62   |
| Rs                      | 14.939        | 8.351 | 2.511  | 14.632        | 8.646         | 14.021        | 7.786  | 13.164 | 10.50   |
| H <sub>O</sub>          | 0.905         | 0.868 | 0.22   | 0.893         | 0.744         | 0.845         | 0.721  | 0.891  |         |
| H <sub>E</sub>          | 0.908         | 0.887 | 0.223  | 0.906         | 0.833         | 0.928         | 0.746  | 0.927  |         |
| F <sub>IS</sub>         | 0.003         | 0.019 | 0.088  | 0.137         | 0.166         | <b>0.122*</b> | 0.053  | 0.045  | 0.079   |
| <i>O. melanura</i> , MA |               |       |        |               |               |               |        |        |         |
| n                       | 46            | 45    | 47     | 47            | 45            | 47            | 46     | 46     |         |
| a                       | 17            | 8     | 3      | 14            | 13            | 16            | 12     | 15     | 12.25   |
| Rs                      | 15.856        | 7.836 | 2.816  | 13.742        | 13.426        | 14.955        | 8.481  | 14.453 | 11.446  |
| H <sub>O</sub>          | 0.934         | 0.812 | 0.085  | 0.896         | 0.833         | 0.865         | 0.673  | 0.717  |         |
| H <sub>E</sub>          | 0.917         | 0.827 | 0.103  | 0.913         | 0.852         | 0.889         | 0.732  | 0.919  |         |
| F <sub>IS</sub>         | -0.022        | 0.095 | 0.025  | 0.01          | 0.036         | 0.038         | 0.08   | 0.22   | 0.060   |
| <i>O. melanura</i> , BL |               |       |        |               |               |               |        |        |         |
| n                       | 34            | 34    | 34     | 33            | 34            | 31            | 34     | 34     |         |
| a                       | 13            | 9     | 3      | 14            | 15            | 16            | 9      | 17     | 12      |
| Rs                      | 11.047        | 8.793 | 3      | 13.917        | 14.028        | 14.587        | 8.404  | 15.152 | 11.116  |
| H <sub>O</sub>          | 0.776         | 0.872 | 0.378  | 0.859         | 0.861         | 0.848         | 0.788  | 0.911  |         |
| H <sub>E</sub>          | 0.837         | 0.905 | 0.385  | 0.892         | 0.927         | 0.926         | 0.838  | 0.916  |         |
| F <sub>IS</sub>         | 0.117         | 0.021 | 0.019  | <b>0.113*</b> | <b>0.137*</b> | 0.081         | 0.043  | 0.004  | 0.066   |

n, number of individuals analyzed; a, number of alleles; Rs, allelic richness; H<sub>O</sub>, observed heterozygosity; H<sub>E</sub>, expected heterozygosity; F<sub>IS</sub>, inbreeding coefficient. Asterisk represents significant F<sub>IS</sub> at  $\alpha = 0.05$ . Significant values after Bonferroni corrections are shown in bold italics.

Table S6. Summary statistics for microsatellite loci among sampling collections of *T. delaisi* species

| Species                | Locus  |        |        |        |        |        |        |               |        |        | Overall |
|------------------------|--------|--------|--------|--------|--------|--------|--------|---------------|--------|--------|---------|
|                        | Td01   | Td02   | Td04   | Td05   | Td06   | Td07   | Td08   | Td09          | Td10   | Td11   |         |
| <i>T. delaisi</i> , HE |        |        |        |        |        |        |        |               |        |        |         |
| n                      | 32     | 32     | 34     | 33     | 32     | 34     | 33     | 34            | 34     | 35     |         |
| a                      | 14     | 12     | 19     | 27     | 31     | 8      | 23     | 9             | 31     | 10     | 18.4    |
| Rs                     | 13.905 | 11.875 | 18.437 | 26.561 | 30.559 | 7.735  | 22.624 | 8.558         | 29.722 | 9.507  | 17.948  |
| H <sub>O</sub>         | 0.938  | 0.969  | 0.884  | 0.974  | 0.968  | 0.794  | 0.843  | 0.618         | 0.971  | 0.486  |         |
| H <sub>E</sub>         | 0.906  | 0.956  | 0.92   | 0.961  | 0.959  | 0.76   | 0.933  | 0.701         | 0.966  | 0.531  |         |
| F <sub>IS</sub>        | -0.034 | -0.033 | 0.099  | -0.03  | -0.032 | -0.061 | 0.127* | <b>0.131*</b> | -0.036 | 0.087  | 0.021   |
| <i>T. delaisi</i> , CG |        |        |        |        |        |        |        |               |        |        |         |
| n                      | 33     | 32     | 33     | 32     | 32     | 32     | 31     | 32            | 32     | 32     |         |
| a                      | 14     | 13     | 17     | 25     | 23     | 7      | 26     | 6             | 27     | 8      | 16.6    |
| Rs                     | 13.815 | 12.843 | 16.801 | 24.684 | 22.778 | 6.969  | 26     | 5.968         | 26.652 | 7.938  | 16.444  |
| H <sub>O</sub>         | 0.879  | 0.906  | 0.909  | 0.906  | 0.875  | 0.684  | 0.933  | 0.531         | 0.875  | 0.73   |         |
| H <sub>E</sub>         | 0.904  | 0.882  | 0.873  | 0.927  | 0.953  | 0.774  | 0.952  | 0.727         | 0.936  | 0.694  |         |
| F <sub>IS</sub>        | 0.028  | -0.092 | -0.041 | 0.023  | 0.081  | 0.115* | 0.052  | <b>0.249*</b> | 0.083  | -0.081 | 0.041   |
| <i>T. delaisi</i> , MA |        |        |        |        |        |        |        |               |        |        |         |
| n                      | 42     | 41     | 42     | 42     | 42     | 42     | 42     | 42            | 42     | 42     |         |
| a                      | 16     | 12     | 18     | 25     | 24     | 7      | 20     | 5             | 26     | 7      | 16      |
| Rs                     | 14.146 | 10.661 | 15.894 | 22.799 | 21.505 | 6.456  | 18.27  | 4.738         | 23.228 | 6.992  | 14.468  |
| H <sub>O</sub>         | 0.881  | 0.814  | 0.881  | 0.952  | 0.881  | 0.548  | 0.891  | 0.643         | 0.957  | 0.738  |         |
| H <sub>E</sub>         | 0.9    | 0.734  | 0.891  | 0.95   | 0.938  | 0.615  | 0.922  | 0.564         | 0.946  | 0.71   |         |
| F <sub>IS</sub>        | 0.022  | -0.125 | 0.012  | -0.002 | 0.06   | 0.09   | 0.094  | <b>0.375*</b> | -0.058 | -0.039 | 0.042   |
| <i>T. delaisi</i> , BL |        |        |        |        |        |        |        |               |        |        |         |
| n                      | 47     | 47     | 47     | 46     | 47     | 47     | 47     | 47            | 47     | 47     |         |
| a                      | 12     | 16     | 20     | 25     | 31     | 8      | 29     | 9             | 27     | 10     | 18.7    |
| Rs                     | 11.28  | 15.416 | 17.867 | 22.505 | 26.374 | 6.865  | 24.589 | 8.181         | 23.897 | 9.383  | 16.635  |
| H <sub>O</sub>         | 0.872  | 0.887  | 0.915  | 0.978  | 0.915  | 0.702  | 0.845  | 0.362         | 0.894  | 0.681  |         |
| H <sub>E</sub>         | 0.876  | 0.913  | 0.917  | 0.936  | 0.961  | 0.683  | 0.951  | 0.749         | 0.923  | 0.735  |         |
| F <sub>IS</sub>        | 0.005  | 0.038  | 0.003  | -0.045 | 0.046  | -0.042 | 0.114* | <b>0.513*</b> | 0.063  | 0.062  | 0.075   |

n, number of individuals analyzed; a, number of alleles; Rs, allelic richness; H<sub>O</sub>, observed heterozygosity; H<sub>E</sub>, expected heterozygosity; F<sub>IS</sub>, inbreeding coefficient. Asterisk represents significant F<sub>IS</sub> at  $\alpha = 0.05$ . Significant values after Bonferroni corrections are shown in bold italics.

Table S7. Summary statistics for microsatellite loci among sampling collections of *A. imberbis* species

| Species                 | Locus  |               |        |               |        |        |        |        | Overall |
|-------------------------|--------|---------------|--------|---------------|--------|--------|--------|--------|---------|
|                         | Aimb14 | Aimb17        | Aimb2  | Aimb22        | Aimb28 | Aimb29 | Aimb41 | Aimb74 |         |
| <i>A. imberbis</i> , HE |        |               |        |               |        |        |        |        |         |
| n                       | 32     | 31            | 32     | 32            | 32     | 32     | 32     | 31     |         |
| a                       | 13     | 20            | 8      | 5             | 7      | 13     | 15     | 9      | 11.25   |
| Rs                      | 12.874 | 20            | 7.968  | 5             | 7      | 12.874 | 14.842 | 9      | 11.194  |
| H <sub>O</sub>          | 0.843  | 0.806         | 0.75   | 0.312         | 0.741  | 0.812  | 0.812  | 0.709  |         |
| H <sub>E</sub>          | 0.876  | 0.933         | 0.771  | 0.646         | 0.79   | 0.879  | 0.866  | 0.727  |         |
| F <sub>IS</sub>         | 0.032  | <b>0.138*</b> | 0.028  | <b>0.505*</b> | 0.089  | 0.064  | 0.055  | -0.005 | 0.113   |
| <i>A. imberbis</i> , CG |        |               |        |               |        |        |        |        |         |
| n                       | 48     | 48            | 48     | 45            | 48     | 47     | 48     | 47     |         |
| a                       | 13     | 20            | 8      | 5             | 6      | 18     | 14     | 8      | 11.5    |
| Rs                      | 11.729 | 18.599        | 7.926  | 5             | 5.863  | 15.91  | 11.955 | 7.609  | 10.573  |
| H <sub>O</sub>          | 0.854  | 0.812         | 0.77   | 0.5           | 0.685  | 0.914  | 0.784  | 0.744  |         |
| H <sub>E</sub>          | 0.879  | 0.939         | 0.805  | 0.64          | 0.723  | 0.901  | 0.841  | 0.644  |         |
| F <sub>IS</sub>         | 0.024  | <b>0.137*</b> | 0.065  | <b>0.174*</b> | 0.059  | -0.016 | 0.097  | -0.179 | 0.045   |
| <i>A. imberbis</i> , MA |        |               |        |               |        |        |        |        |         |
| n                       | 46     | 42            | 48     | 47            | 48     | 48     | 48     | 48     |         |
| a                       | 10     | 21            | 7      | 6             | 8      | 18     | 7      | 8      | 10.625  |
| Rs                      | 9.473  | 19.498        | 6.712  | 5.621         | 7.518  | 15.533 | 6.518  | 7.263  | 9.767   |
| H <sub>O</sub>          | 0.774  | 0.603         | 0.687  | 0.404         | 0.77   | 0.896  | 0.729  | 0.541  |         |
| H <sub>E</sub>          | 0.833  | 0.934         | 0.736  | 0.622         | 0.822  | 0.895  | 0.679  | 0.624  |         |
| F <sub>IS</sub>         | 0.048  | <b>0.437*</b> | 0.087  | <b>0.35*</b>  | 0.057  | -0.001 | -0.109 | 0.133* | 0.125   |
| <i>A. imberbis</i> , BL |        |               |        |               |        |        |        |        |         |
| n                       | 47     | 47            | 46     | 42            | 47     | 45     | 46     | 47     |         |
| a                       | 14     | 25            | 7      | 6             | 8      | 16     | 15     | 9      | 12.5    |
| Rs                      | 12.889 | 22.961        | 6.957  | 5.737         | 7.531  | 14.36  | 12.595 | 7.828  | 11.357  |
| H <sub>O</sub>          | 0.872  | 0.872         | 0.772  | 0.412         | 0.872  | 0.862  | 0.841  | 0.672  |         |
| H <sub>E</sub>          | 0.836  | 0.938         | 0.843  | 0.64          | 0.749  | 0.873  | 0.872  | 0.728  |         |
| F <sub>IS</sub>         | 0.084  | 0.089         | 0.112* | <b>0.583*</b> | -0.052 | 0.037  | 0.067  | 0.011  | 0.116   |

n, number of individuals analyzed; a, number of alleles; Rs, allelic richness; H<sub>O</sub>, observed heterozygosity; H<sub>E</sub>, expected heterozygosity; F<sub>IS</sub>, inbreeding coefficient. Asterisk represents significant F<sub>IS</sub> at  $\alpha = 0.05$ . Significant values after Bonferroni corrections are shown in bold italics.



Table S8. Summary statistics for 63 microsatellite loci among sampling collections of *S. tinca* species

| Species              | Locus         |        |        |        |        |        |        |        | Overall |
|----------------------|---------------|--------|--------|--------|--------|--------|--------|--------|---------|
|                      | St138         | St143  | St155  | St222  | St287  | St368  | St245  | St336  |         |
| <i>S. tinca</i> , HE |               |        |        |        |        |        |        |        |         |
| n                    | 37            | 37     | 39     | 39     | 40     | 39     | 37     | 39     |         |
| a                    | 15            | 9      | 11     | 10     | 9      | 17     | 12     | 13     | 12      |
| Rs                   | 15            | 9      | 10.897 | 9.895  | 8.915  | 16.791 | 11.987 | 12.879 | 11.92   |
| H <sub>O</sub>       | 0.568         | 0.749  | 0.897  | 0.821  | 0.825  | 0.886  | 0.872  | 0.845  |         |
| H <sub>E</sub>       | 0.911         | 0.788  | 0.883  | 0.83   | 0.796  | 0.914  | 0.896  | 0.856  |         |
| F <sub>IS</sub>      | <b>0.378*</b> | 0.114  | -0.023 | 0.005  | -0.036 | 0.075  | 0.084  | 0.091  | 0.086   |
| <i>S. tinca</i> , CG |               |        |        |        |        |        |        |        |         |
| n                    | 54            | 51     | 58     | 57     | 57     | 55     | 54     | 57     |         |
| a                    | 17            | 11     | 13     | 12     | 11     | 17     | 15     | 13     | 13.625  |
| Rs                   | 15.625        | 10.916 | 12.174 | 10.847 | 9.471  | 15.448 | 14.724 | 12.677 | 12.735  |
| H <sub>O</sub>       | 0.759         | 0.843  | 0.897  | 0.895  | 0.789  | 0.836  | 0.847  | 0.798  |         |
| H <sub>E</sub>       | 0.926         | 0.86   | 0.891  | 0.825  | 0.786  | 0.89   | 0.86   | 0.824  |         |
| F <sub>IS</sub>      | <b>0.179*</b> | 0.018  | -0.005 | -0.085 | -0.008 | 0.061  | 0.008  | 0.027  | 0.024   |
| <i>S. tinca</i> , MA |               |        |        |        |        |        |        |        |         |
| n                    | 45            | 47     | 47     | 47     | 47     | 46     | 45     | 47     |         |
| a                    | 15            | 12     | 11     | 12     | 9      | 17     | 12     | 11     | 12.375  |
| Rs                   | 14.575        | 11.778 | 10.903 | 10.934 | 8.566  | 16.701 | 11.878 | 10.902 | 12.029  |
| H <sub>O</sub>       | 0.6           | 0.915  | 0.83   | 0.745  | 0.723  | 0.843  | 0.864  | 0.757  |         |
| H <sub>E</sub>       | 0.902         | 0.886  | 0.878  | 0.796  | 0.793  | 0.904  | 0.878  | 0.769  |         |
| F <sub>IS</sub>      | <b>0.332*</b> | -0.032 | 0.05   | 0.066  | 0.076  | 0.133* | 0.06   | 0.078  | 0.095   |
| <i>S. tinca</i> , BL |               |        |        |        |        |        |        |        |         |
| n                    | 51            | 49     | 51     | 51     | 45     | 50     | 49     | 51     |         |
| a                    | 19            | 12     | 13     | 13     | 10     | 16     | 13     | 17     | 14.125  |
| Rs                   | 17.092        | 11.446 | 12.554 | 11.802 | 9.584  | 15.716 | 12.677 | 15.098 | 13.246  |
| H <sub>O</sub>       | 0.529         | 0.878  | 0.882  | 0.726  | 0.8    | 0.898  | 0.915  | 0.773  |         |
| H <sub>E</sub>       | 0.907         | 0.874  | 0.894  | 0.8    | 0.792  | 0.926  | 0.927  | 0.784  |         |
| F <sub>IS</sub>      | <b>0.414*</b> | -0.003 | 0.013  | 0.123* | -0.012 | 0.066  | 0.012  | 0.015  | 0.078   |

n, number of individuals analyzed; a, number of alleles; Rs, allelic richness; H<sub>O</sub>, observed heterozygosity; H<sub>E</sub>, expected heterozygosity; F<sub>IS</sub>, inbreeding coefficient. Asterisk represents significant F<sub>IS</sub> at  $\alpha = 0.05$ . Significant values after Bonferroni corrections are shown in bold italics.
